# Supplementary material
Source: PubMed Central journal article supplement (PMC7983326)
Supplement: supplementary_figure_1.pdf [file supplementary_figure_1.pdf]

# Suppl. figure 1

a

$$\text{Relative AKR1D1-001} = \frac{\text{Total AKR1D1} - (\text{AKR1D1-002} + \text{AKR1D1-006})}{\text{Total AKR1D1}} \times 100$$

$$= \frac{\text{Probe}_{\text{EXONS 3-4}} - \text{Probe}_{\text{EXONS 7-8}}}{\text{Probe}_{\text{EXONS 3-4}}} \times 100$$

$$\text{Relative AKR1D1-006} = \frac{\text{Total AKR1D1} - (\text{AKR1D1-002} + \text{AKR1D1-001})}{\text{Total AKR1D1}} \times 100$$

$$= \frac{\text{Probe}_{\text{EXONS 3-4}} - \text{Probe}_{\text{EXONS 5-6}}}{\text{Probe}_{\text{EXONS 3-4}}} \times 100$$
