# Supplementary material
Source: PubMed Central journal article supplement (PMC7983326)

# Suppl. figure 2

a

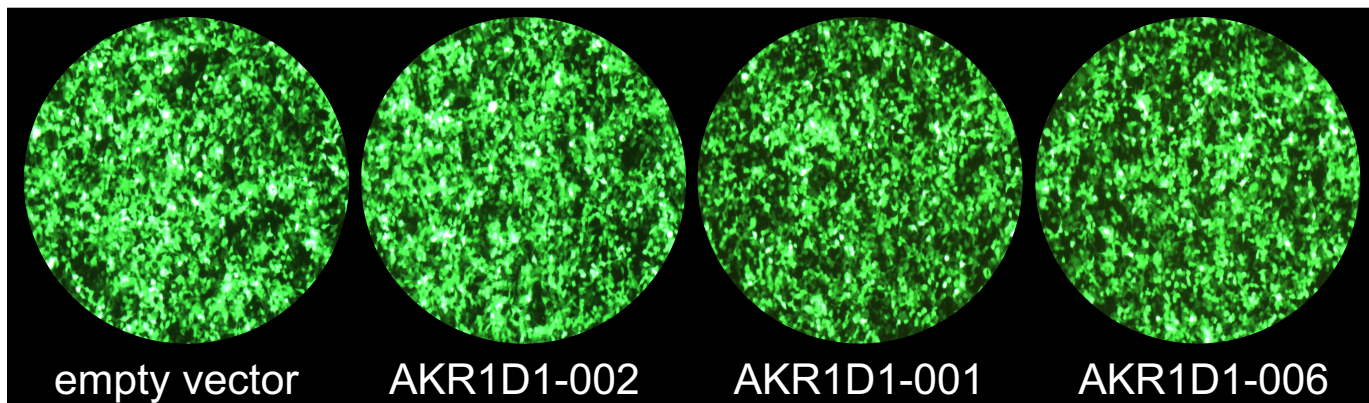

b

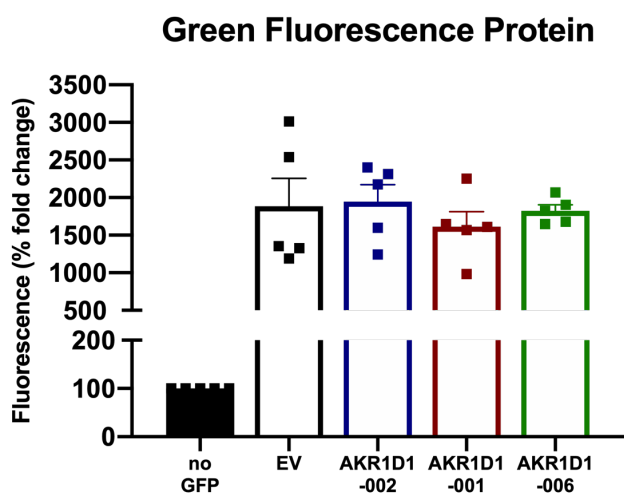

c

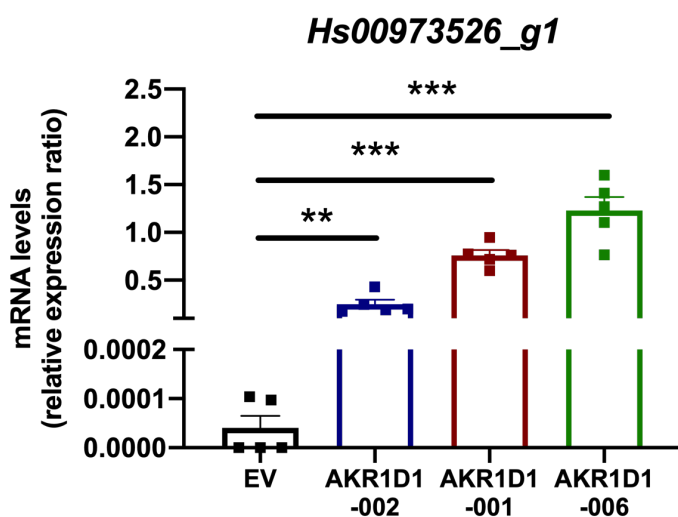

d

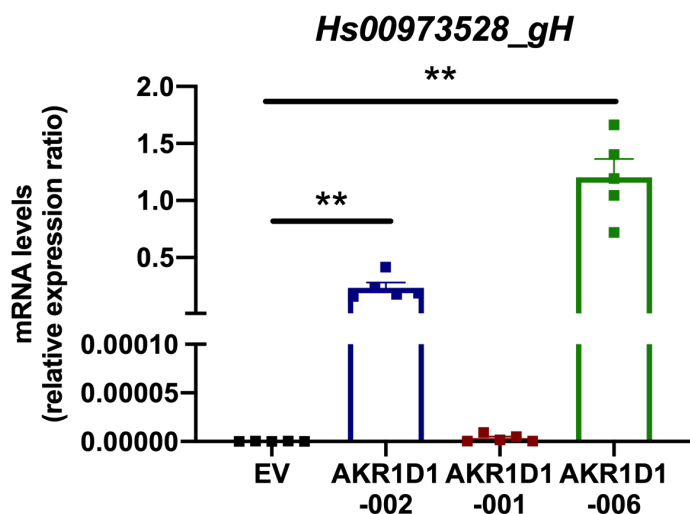

e

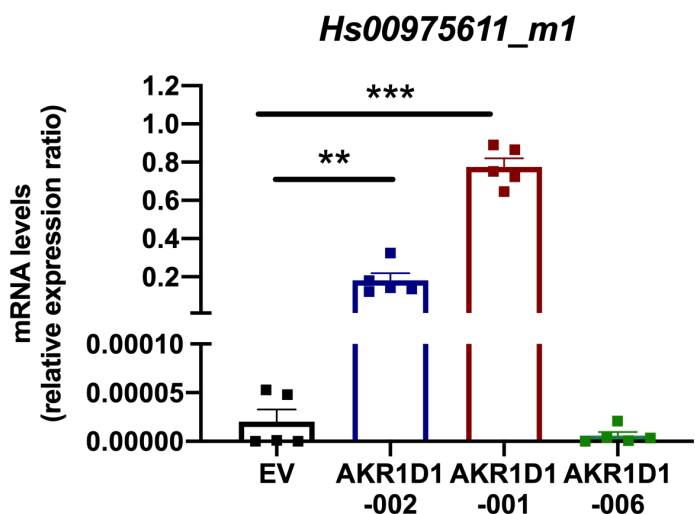

Supplement: supplementary_figure_2.pdf [file supplementary_figure_2.pdf]
